# Supplementary material for: West Nile Virus in Common Wild Avian Species in Israel
Source: MDPI journal article supplement (doi:10.3390/pathogens11010107), 2022-01-17
Supplement: s1 [file s1]

[illegible][illegible][illegible][illegible][illegible][illegible]
